## P577

**Effect of adding an implantable cardioverter defibrillator on long-term survival in non-ischemic CRT patients stratified by Goldenberg risk score**

Kosztin A.; Schwertner WR.; Behon A.; Merkel E.; Zima E.; Geller L.; Becker D.; Merkely B.

Semmelweis University, Heart Center, Budapest, Hungary

**Background:** There are limited and incomprehensive long-term data on the effects of adding an implantable cardioverter defibrillator (ICD) to cardiac resynchronization therapy (CRT) in patients with non-ischemic heart failure.

**Purpose:** We compared the long-term all-cause mortality and relative risk reduction in mortality of non-ischemic patients after CRT-P vs. CRT-D implantation stratified by their Goldenberg risk score.

**Methods:** In our retrospective registry, data of 1196 non-ischemic patients who underwent CRT implantation between 2000 to 2018 were collected. Goldenberg sudden cardiac risk score was calculated by the presence of atrial fibrillation, NYHA class > 2, age > 70 years, blood urea nitrogen > 26mg/dl and QRS width.

**Results:** In our registry from 1196 CRT implanted patients with non-ischemic heart failure, 716 patients had all the required data to calculate the Goldenberg score. From this cohort 379 (53%) had CRT-P and 337 (47%) CRT-D implantation. The mean value of the Goldenberg score was 2.7 in the total cohort, while a significantly higher score was found in the CRT-P group (CRT-P  $2.9 \pm 1.1$  vs. CRT-D  $2.5 \pm 1.1$   $p < 0.001$ ). During the median follow-up time of 4.9 years, 345 (48%) patients reached the primary endpoint, 220 patients (64%) with CRT-P and 125 patients (36%) with CRT-D. After comparing patients by low ( $\leq 3$ ) and high ( $> 3$ ) Goldenberg score, we found that CRT-D patients with lower risk score showed mortality benefit compared to CRT-P (HR 0.69; 95% CI 0.53-0.89;  $p = 0.001$ ). In the contrary there was no apparent mortality benefit in CRT-D patients compared to CRT-P when high Goldenberg score subgroup was analyzed (HR 0.99; 95% CI 0.67-1.45;  $p = 0.95$ ).

**Conclusions:** In non-ischemic heart failure patients, Goldenberg sudden cardiac risk score can be also applied. In CRT-D patients those with less co-morbidities and lower ( $\leq 3$ ) Goldenberg risk score showed mortality benefit compared to CRT-P patients, while among patients with higher score ( $> 3$ ) adding an ICD had no additional effect on all-cause mortality.
